# Supplementary material for: Super-enhancers include classical enhancers and facilitators to fully activate gene expression
Source: PubMed Central journal article supplement — Cell. Author manuscript; Available in PMC 2024 Feb 10. (PMC10858684; doi:10.1016/j.cell.2023.11.030), 2023-12-14
Supplement: NIHMS1960483-supplement-Tables_S1_and_S2.pdf [file NIHMS1960483-supplement-Tables_S1_and_S2.pdf]

**Cell, Volume 186**

**Supplemental information**

**Super-enhancers include classical enhancers  
and facilitators to fully activate gene expression**

**Joseph W. Blayney, Helena Francis, Alexandra Rampasekova, Brendan Camellato, Leslie Mitchell, Rosa Stolper, Lucy Cornell, Christian Babbs, Jef D. Boeke, Douglas R. Higgs, and Mira Kassouf**

| <b>Stage</b>        | <b>Hom</b> | <b>Het</b> | <b>WT</b> |
|---------------------|------------|------------|-----------|
| <b>E9.5</b>         | 1          | 5          | 2         |
| <b>E10.5</b>        | 2          | 12         | 6         |
| <b>E12.5</b>        | 5          | 7          | 5         |
| <b>E14.5</b>        | 4          | 6          | 3         |
| <b>E17.5</b>        | 3          | 7          | 6         |
| <b>Cumulative</b>   | <b>15</b>  | <b>37</b>  | <b>22</b> |
| <b>Cumulative %</b> | <b>20</b>  | <b>50</b>  | <b>30</b> |

**Table S1. Related to Figure 2A. Summary of genotypes from heterozygote crosses showing the observed Mendelian ratio at each gestational stage.**

| <b>Application</b>        | <b>Target</b>    | <b>Vector</b> | <b>Guide RNA sequence</b> |
|---------------------------|------------------|---------------|---------------------------|
| Allele deletion           | Left breakpoint  | pX458         | ACAAGATGCTCTCCGCTGT       |
|                           | Right breakpoint | pX458-Ruby    | AGGACAAATCCCGAAGGTC       |
| R1 deletion               | Left breakpoint  | pX458         | GTGACCATAAGTTGATTAG       |
|                           | Right breakpoint | pX458-Ruby    | GTACATACGCCGGGCGTGG       |
| R2 deletion               | Left breakpoint  | pX458-Ruby    | TACCTCCAAGGTTTTGCTC       |
|                           | Right breakpoint | pX458         | GCCGTGACACTTCATGCTCA      |
| R3 deletion               | Left breakpoint  | pX458         | GGACTGAGGGAATTTTGTACA     |
|                           | Right breakpoint | pX458-Ruby    | GGACTGGCAGAAAGCTATGT      |
| Rm deletion               | Left breakpoint  | pX458         | GGACCAGCGTAGTCTAACTCC     |
|                           | Right breakpoint | pX458-Ruby    | GGACTCAACCACATGACTCA      |
| R4 deletion               | Left breakpoint  | pX458-Ruby    | GGTGCATCACCTCAACTCCCA     |
|                           | Right breakpoint | pX458         | GGCTAGCTGAATAATTTGCGG     |
| R4 for reinsertion by HDR | Right breakpoint | pX458         | GGATCCCAGGTTAGTTAGTCC     |

**Table S2. Related to STAR Methods. Guide RNA sequences used in mESC CRISPR editing.**
